Correction

# Correction: The Cost-Effectiveness of Laparoscopic Adjustable Gastric Banding in the Morbidly Obese Adult Population of Australia

The PLOS ONE Staff

Figure 2 and its legend are incorrect. The authors have provided the correct Figure 2 and its legend here.

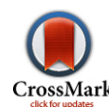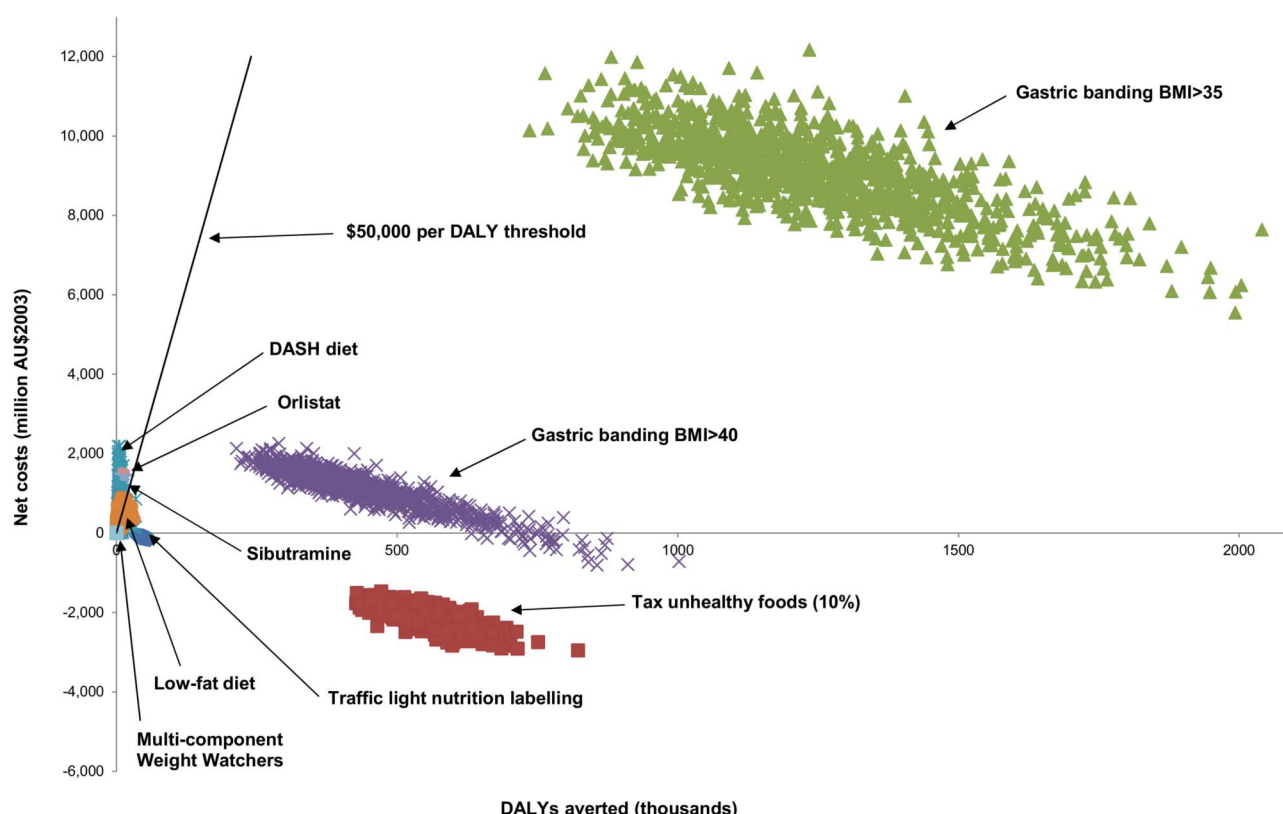

**Figure 2. Cost-effectiveness scatterplot of high body mass interventions analyzed under ACE Prevention.** Note that all interventions were analyzed with the inclusion of time and travel costs and the cost of unrelated diseases.

## Reference

1. Lee YY, Veerman JL, Barendregt JJ (2013) The Cost-Effectiveness of Laparoscopic Adjustable Gastric Banding in the Morbidly Obese Adult Population of Australia. PLoS ONE 8(5): e64965. doi:10.1371/journal.pone.0064965

**Citation:** The PLOS ONE Staff (2014) Correction: The Cost-Effectiveness of Laparoscopic Adjustable Gastric Banding in the Morbidly Obese Adult Population of Australia. PLoS ONE 9(8): e106266. doi:10.1371/journal.pone.0106266

**Published:** August 15, 2014

**Copyright:** © 2014 The PLOS ONE Staff. This is an open-access article distributed under the terms of the Creative Commons Attribution License, which permits unrestricted use, distribution, and reproduction in any medium, provided the original author and source are credited.
